**S1 Table: Step-by-step protocol**

| STEP | PROCEDURE                                                                                                                                                   |
|------|-------------------------------------------------------------------------------------------------------------------------------------------------------------|
| 1    | Define two bench zones for sample preparation and amplification area                                                                                        |
| 2    | Use two pair of gloves and clean carefully all surfaces with 1% sodium hypochlorite solution                                                                |
| 3    | Sodium hypochlorite must be in contact to surfaces at least 5 min                                                                                           |
| 4    | Remove excess sodium hypochlorite with water and dry using a paper towel                                                                                    |
| 5    | Transfer the sample* + 30 $\mu$ L NaCl 334mM <sup>§</sup> into Heating Tube <sup>§</sup>                                                                    |
| 6    | Mix by inverting 3 to 5 times                                                                                                                               |
| 7    | Remove the external pair of gloves                                                                                                                          |
| 8    | Incubate the heating tubes 5 min at 75 °C in a dry heater                                                                                                   |
| 9    | Remove the cap ring from the top of the Adsorbent Tube <sup>§</sup> and screw the heating tube into the adsorbent tube                                      |
| 10   | Mix vigorously, 10 times vertically and 10 times horizontally, until completed suspension of the adsorbent powder                                           |
| 11   | Cover the Injection Cap <sup>§</sup> with the cap ring and screw it into the bottom of the adsorbent tube                                                   |
| 12   | Squeeze the PURE device to drop the DNA eluate into the LAMP reaction tube <sup>#</sup> up to the middle of the two lines (approx. 30 $\mu$ L) <sup>¶</sup> |
| 13   | Close immediately the cap sample-by-sample                                                                                                                  |
| 14   | Add 30 $\mu$ L Positive Control** to LAMP reaction tube                                                                                                     |
| 15   | Turn the tubes upside down and place the reaction tubes cap-side down on the bench for 2 min to dissolve the dried LAMP reagent inside the tube cap         |
| 16   | Mix by inverting 5 times and then shake the reaction tubes downwards to collect the solution into the bottom of the tubes                                   |
| 17   | Immediately place the reaction tubes into the incubator or heating-block during 40 min at 65 °C and 5 min at 80 °C                                          |
| 18   | Read the reaction by naked eye or blue led visor light                                                                                                      |

\* Sample: 30  $\mu$ L heparin blood or 6-mm FTA or 30  $\mu$ L Negative Control\*\*

§ PURE system: the kit provides 90 Heating Tubes, 90 Adsorbent Tubes, 90 Injection Caps, 2 tubes of 334 mM NaCl solution.

# LAMP kit: the kit has 48 reaction tubes (6 strips x 8 tubes) with dried LAMP reagent inside the tube cap, 3 tubes of Negative Control, one tube of Positive Control.

¶ Right-handed operators should perform this step from right to left along the LAMP strip, whereas left-handed operators should perform it in the opposite direction, to avoid contaminating open LAMP microtubes.
